# Supplementary material
Source: PubMed Central journal article supplement (PMC3528692)
Supplement: epi-7-1368-s02.pdf [file epi-7-1368-s02.pdf]

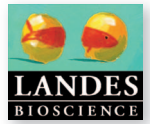

## **Supplemental Material to:**

**Jaroslav Jelinek, Shoudan Liang, Yue Lu, Rong He, Louis S.  
Ramagli, Elizabeth J. Shpall, Marcos R.H. Estecio  
and Jean-Pierre J. Issa**

**Conserved DNA methylation patterns in healthy blood  
cells and extensive changes in leukemia measured by a  
new quantitative technique**

**Epigenetics 2012; Vol(12)**

**<http://dx.doi.org/10.4161/epi.22552>**

**<http://www.landesbioscience.com/journals/epigenetics/article/22552>**

## Supplementary Data

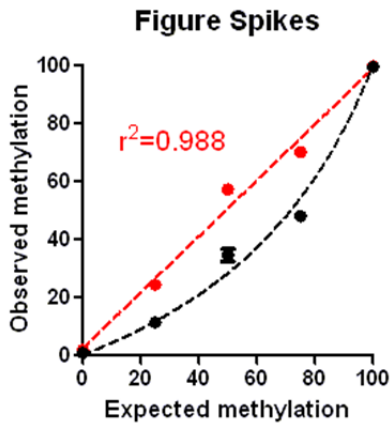

Supplementary Figure 1. Spiked-in methylation standards.

Black, values of DNA methylation measured by DREAM (observed methylation) plotted against expected methylation values based on the fraction of *M.SssI* methylated DNA. Red, methylation values after correction computed as  $100\% * (c * sm / (c * sm + u))$ , where  $m/u$  is the expected ratio of methylated and unmethylated reads, while  $sm$  and  $u$  are observed numbers of methylated and unmethylated reads. Correction factor  $c$  was calculated as an antilog of the average difference between log ratios of  $\ln(m/u)$  and  $\ln(sm/u)$ . Broken red line shows linear regression of corrected values. Broken black curve shows interpolation of uncorrected methylation values. Linear regression of corrected values showed an excellent fit (slope 0.967 and  $r^2=0.988$ ).

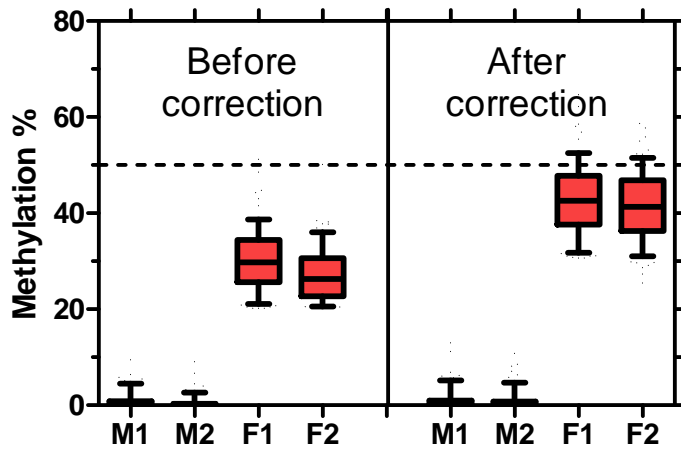

**Supplementary Figure 2. Uncorrected and corrected methylation values on the X chromosome.**

Uncorrected and spike-corrected methylation values at 159 CpG sites in CpG islands that were subject to differential methylation on the inactivated X chromosome in white blood cells from two healthy males (M1, M2) and two healthy females (F1, F2). Methylation in males is below 1% while corrected methylation values in females are close to expected 50%.

A

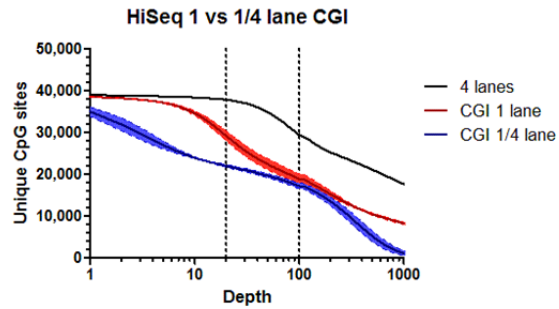

B

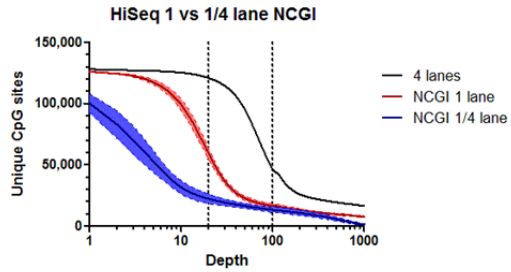

**Supplementary Figure 3.** Minimum sequencing depth and the numbers of unique CpG sites captured by DREAM. (A) CCCGGG sites in CpG islands. (B) CCCGGG sites outside of CpG islands. Black, 4 HiSeq lanes; red, single HiSeq lane, 4 samples; blue, ¼ of HiSeq lane, 4 samples. Solid lines show means; colored areas between broken lines show mean  $\pm$  SEM.

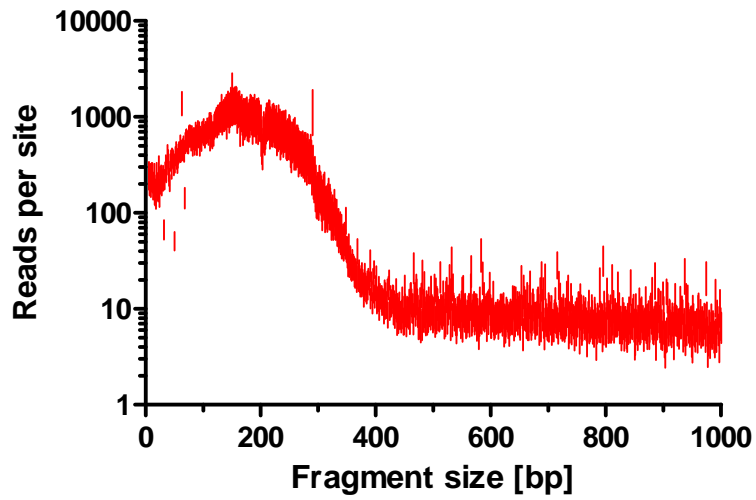

**Supplementary Figure 4. Sequencing depth based on the mutual distance of restriction sites.**

The X axis shows distances of *SmaI/XmaI* sites to the nearest neighboring site. The graph shows average numbers of reads  $\pm$  SEM (y axis) based on the distance between neighboring *SmaI/XmaI* sites (x axis). The sites with the nearest neighbor within 400 bases have 20-100-fold higher sequencing coverage than the remaining sites.

A

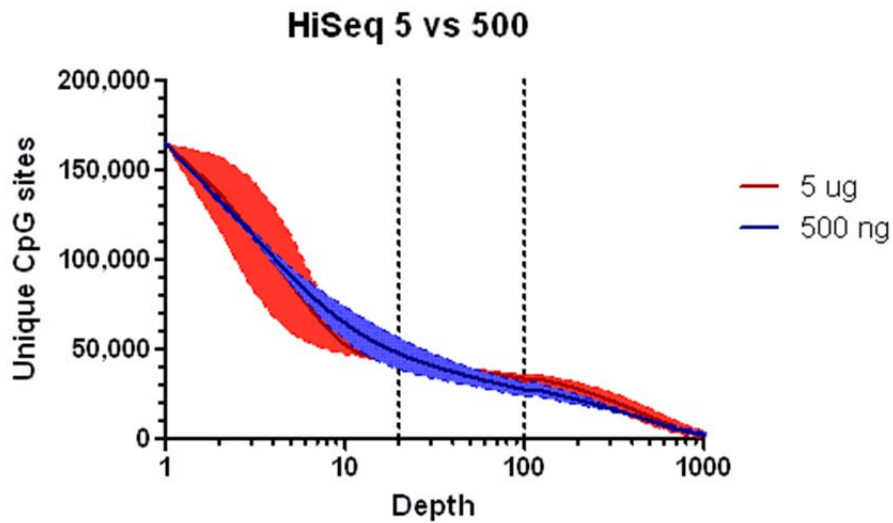

B

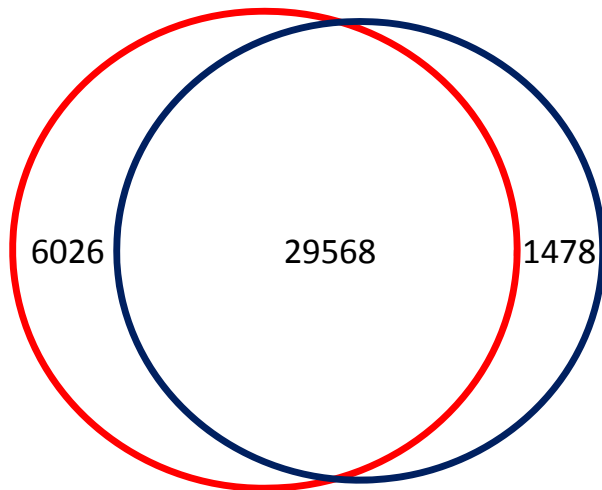

**Supplementary Figure 5.** (A) Sequencing depth for libraries made from 5  $\mu$ g vs 500 ng healthy human white blood cell gDNA . Numbers of unique CCCGGG sites captured by DREAM. Red, 5  $\mu$ g gDNA  $\frac{1}{4}$  HiSeq lane, 2 samples; blue, 500 ng gDNA  $\frac{1}{4}$  of HiSeq lane, 2 samples. Solid lines show means; colored areas between broken lines show mean  $\pm$  SEM. (B) The coverage of CCCGGG sites was comparable with a 80% overlap of sites covered by 100+ reads in both libraries. Red, 5  $\mu$ g gDNA; blue 500 ng gDNA.

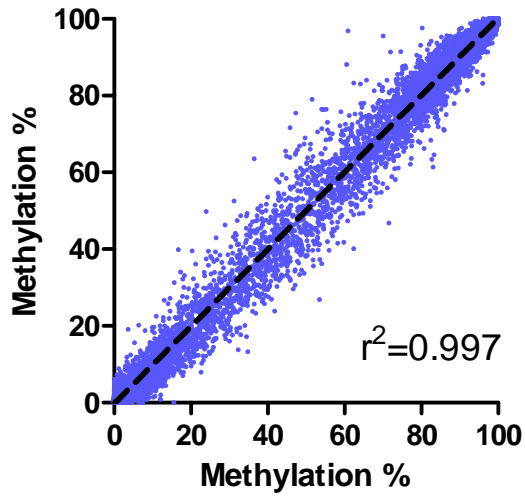

**Supplementary Figure 6.** Correlation between technical replicates. DNA methylation values at 28,522 CCGGG sites covered by 100+ reads. Libraries from the same sample of healthy WBC DNA were prepared and sequenced on separate occasions.

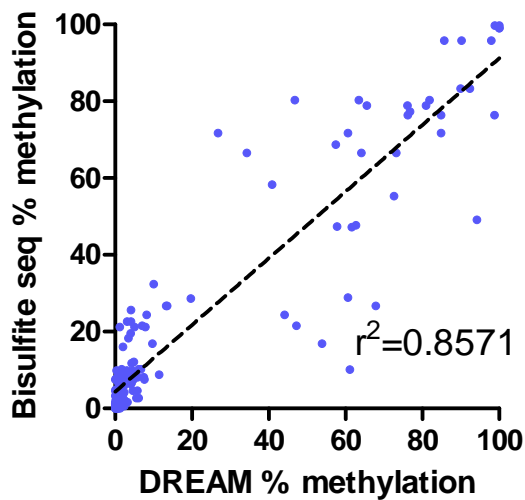

**Supplementary Figure 7.** Validation of DREAM results. Bisulfite sequencing vs DREAM. Methylation at CCGGG sites and neighboring CpG sites. Linear regression  $r^2=0.857$ ,  $P<0.0001$ .

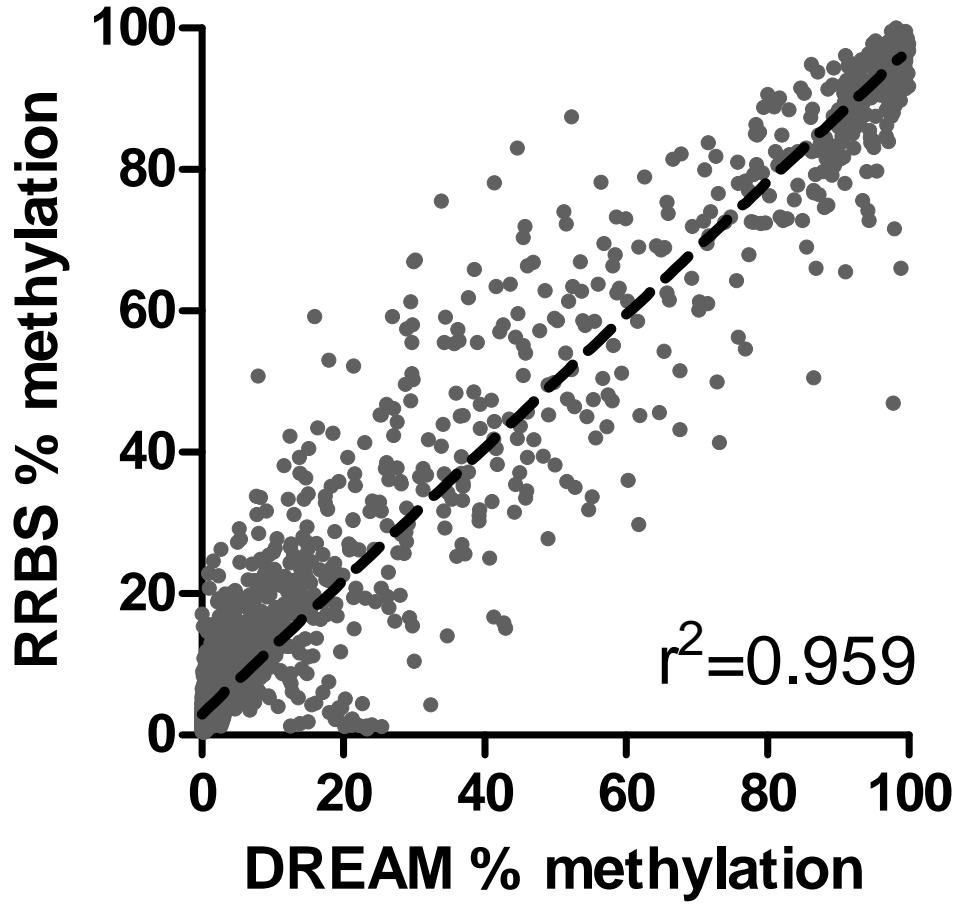

**Supplementary Figure 8.** Validation of DREAM results. Reduced representation bisulfite sequencing, normal leukocytes vs DREAM. Minimum coverage 50+ reads. Linear regression  $r^2=0.959$ ,  $P<0.0001$ .



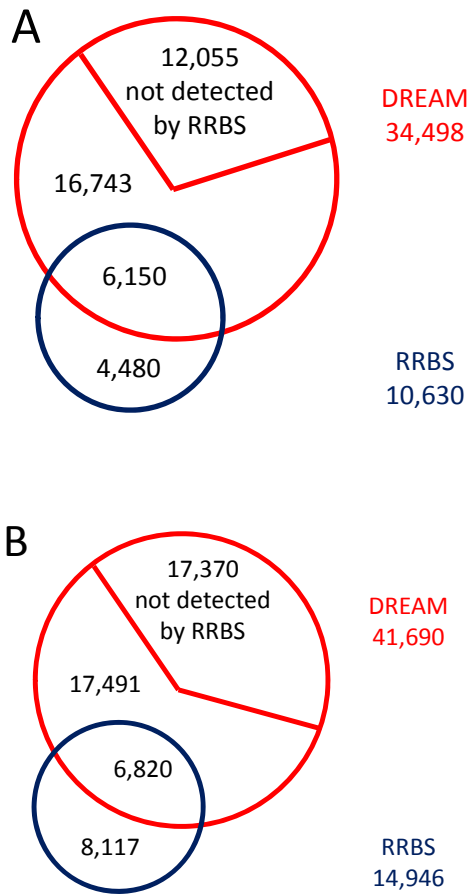

**Supplementary Figure 9.** Overlap between the CCCGGG sites covered by RRBS and DREAM by 50+ reads was relatively small, 16% for normal WBCs (A) and 14% for K562 cells (B). We detected 12,055 and 17,370 sites in normal WBCs and K562 cells, respectively, that had zero coverage by RRBS. Approximately two thirds of these sites were not in CpG islands.

A

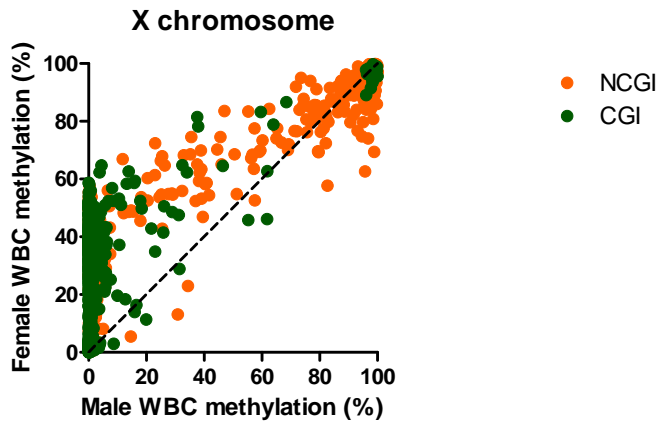

B

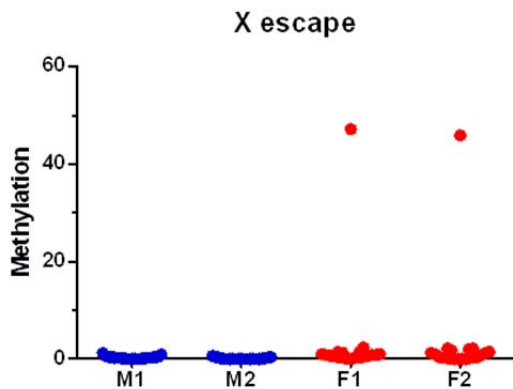

C

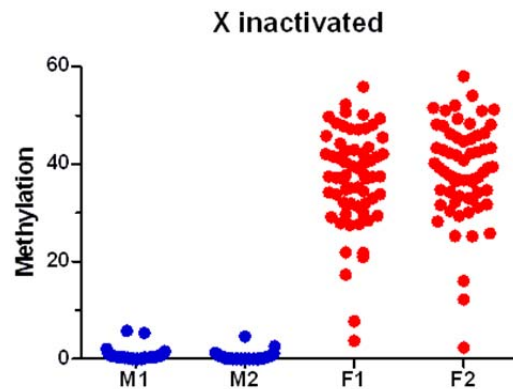

**Supplementary Figure 10.** Methylation on the X chromosome in female and male DNA. (A) Scatter plot showing methylation at 614 CCCGGG sites. Green, sites in CpG islands. Orange, sites outside CpG islands. (B) Sites in CpG islands within 1 kb TSS from TSS of genes reported as expressed on inactive X chromosome. (C) Sites in CpG islands within 1 kb TSS from TSS of genes reported as silenced on inactive X chromosome (Carrel and Willard 2005).

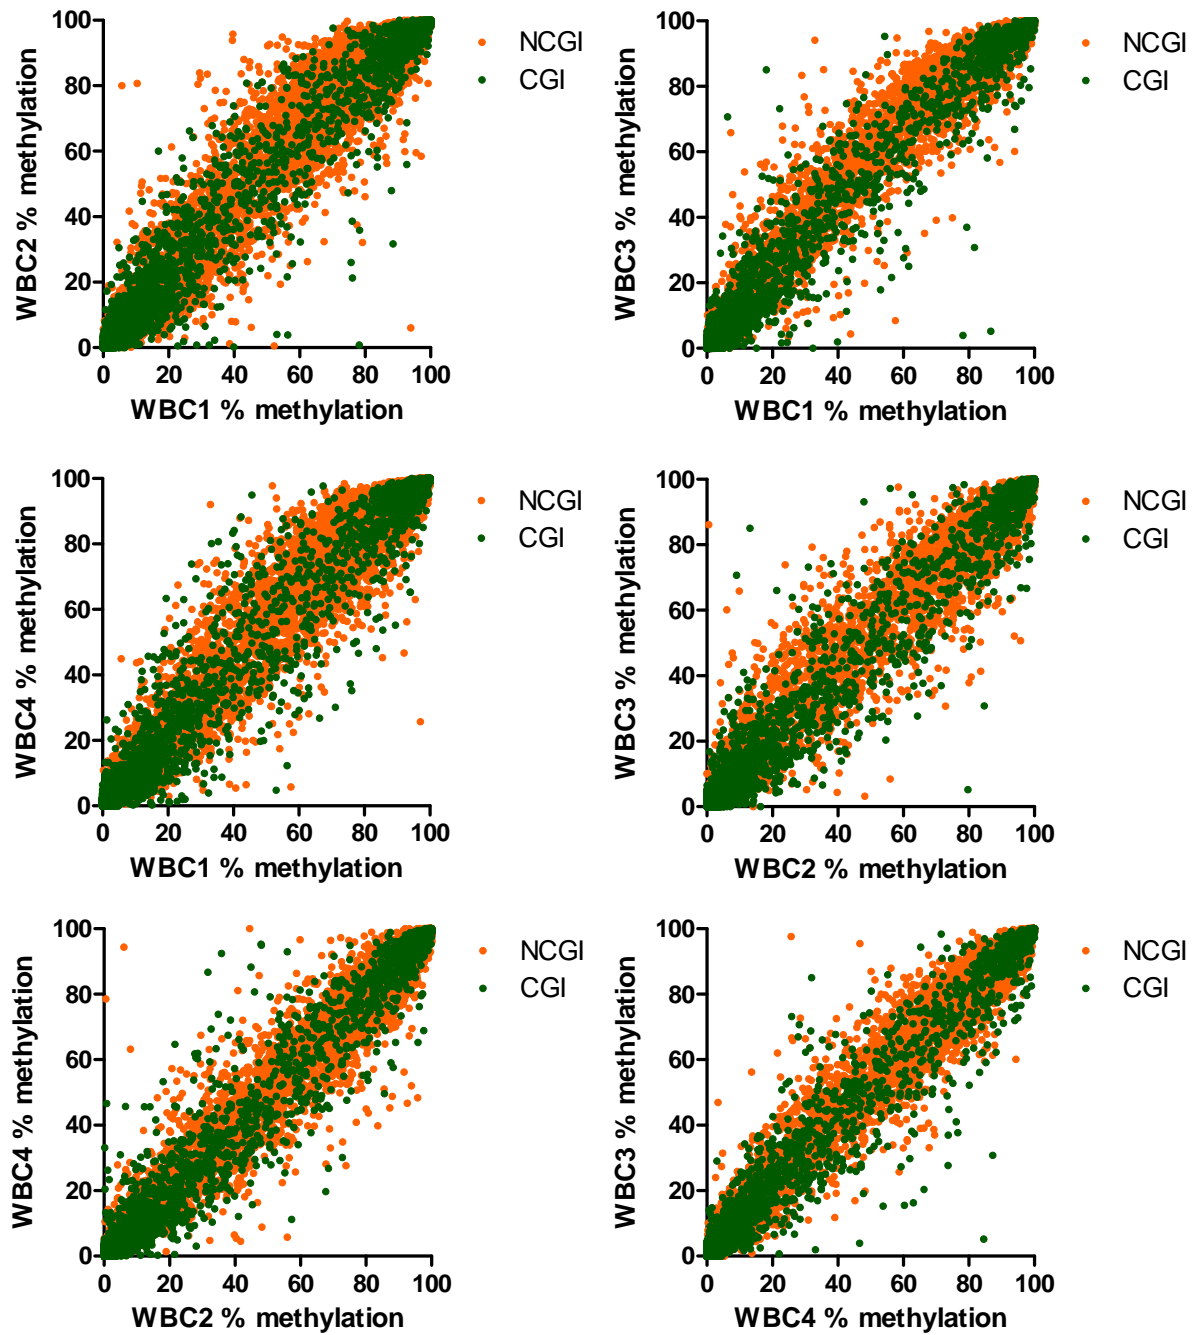

**Supplementary Figure 11.** Small differences in DNA methylation between pairs of WBC samples from healthy adults. Green, sites in CpG islands. Orange, sites outside of CpG islands.

Supplementary Table 1: Summary of sequencing data

| Sample* | Number of lanes <sup>#</sup> |       | Reads in repeats | Uniquely mapped reads | Unique CpG sites with minimum coverage |           |
|---------|------------------------------|-------|------------------|-----------------------|----------------------------------------|-----------|
|         | GAll                         | HiSeq |                  |                       | 20 reads                               | 100 reads |
| NWBC1   | 6                            | 0     | 13,614,227       | 28,033,541            | 46,967                                 | 40,396    |
| NWBC2   | 0                            | 3.25  | 38,884,926       | 72,110,046            | 123,505                                | 47,965    |
| NWBC3   | 2                            | 0     | 7,216,231        | 13,368,413            | 40,487                                 | 32,165    |
| NWBC4   | 2                            | 0.5   | 31,303,581       | 51,251,441            | 64,881                                 | 42,202    |
| CB1     | 0                            | 2     | 64,859,753       | 120,476,642           | 133,273                                | 48,486    |
| CB2     | 0                            | 2     | 63,084,746       | 113,023,565           | 145,810                                | 50,921    |
| AML     | 2                            | 0     | 3,343,599        | 9,178,473             | 39,514                                 | 28,721    |
| K562    | 2                            | 0     | 6,386,209        | 10,075,503            | 49,630                                 | 31,121    |
| HEL     | 2                            | 0     | 5,129,563        | 7,169,746             | 53,202                                 | 25,316    |

\*NWBC1-NWBC4, normal white blood cells; CB1, CB2, cord blood cells; AML, bone marrow from a patient with acute myeloid leukemia; K562, HEL, leukemia cell lines.

<sup>#</sup> GAll, Illumina Genome Analyzer II; HiSeq, Illumina HiSeq 2000.

**Supplementary Table 2. Analysis of DNA inserts in DREAM libraries by cloning and Sanger sequencing.**

| DNA sample            | WBC1 | WBC3 | HEL | K562 |
|-----------------------|------|------|-----|------|
| Informative ends*     | 91%  | 65%  | 67% | 56%  |
| SmaI sites both ends  | 85%  | 42%  | 60% | 50%  |
| SmaI sites single end | 11%  | 46%  | 13% | 13%  |
| No SmaI site          | 4%   | 13%  | 27% | 38%  |

Informative ends of fragment map to SmaI/XmaI site and start with GGG or CCGG.

Supplementary Table 3. Primers for bisulfite PCR

| Gene            | PCR step | Primer name   | Sequence                        |
|-----------------|----------|---------------|---------------------------------|
| <i>ACOT12</i>   | single   | ACOT12-222F   | ggttttaggagaagtttggaag          |
|                 |          | ACOT12-222R   | aatcaaacatccaccaatcca           |
| <i>ADAM8</i>    | single   | ADAM8-F387    | tttgggaattatttatTAGGTAGT        |
|                 |          | ADAM8-R387    | cctcccctccaaaacctac             |
| <i>CRIP1</i>    | 1st      | CRIP1-F385    | gttttggggagggtaggatt            |
|                 |          | CRIP1-R385    | aaaccctaaacttaaacctaaaa         |
|                 | 2nd      | CRIP1-F385    | gttttggggagggtaggatt            |
|                 |          | CRIP1-R353    | tctaaaccctaaaccctaaaa           |
| <i>DPYS</i>     | 1st      | DPYS-F482     | gggtatTTTGGTGTTTTGGTG           |
|                 |          | DPYS-R482     | aaactccaaccaaccttc              |
|                 | 2nd      | DPYS-F439     | TTTATGAAGGGAATTGTATGTG          |
|                 |          | DPYS-R482     | aaactccaaccaaccttc              |
| <i>FAM65B</i>   | single   | FAM65B-F351   | gggtaaatgaagattttgagattgtt      |
|                 |          | FAM65B-R351   | cctcaactccaccacctaa             |
| <i>IKBKB</i>    | 1st      | IKBKB-548F1   | ggtttgtttatttttttagttgttagattat |
|                 |          | IKBKB-373R    | caaattcccctcaaacca              |
|                 | 2nd      | IKBKB-373F2   | aGAGTAGGAAGTGTGAGGAAG           |
|                 |          | IKBKB-373R    | caaattcccctcaaacca              |
| <i>PRRG4</i>    | 1st      | PRRG4-153F    | GTAGGGTTTGGATGGTTTT             |
|                 |          | PRRG4-153R    | accaaataatcccccaataac           |
|                 | 2nd      | PRRG4-F126    | TAAATTTGGGAAGGGTTTGG            |
|                 |          | PRRG4-R126    | caaataatcccccaataacc            |
| <i>RIPK4</i>    | single   | RIPK4-F322    | gggagagagaggtaggattt            |
|                 |          | RIPK4-R322    | CACCTAAACACCTAAACAACC           |
| <i>SLC35F3</i>  | single   | SLC35F3-F136  | gggatattgggtagttgaggt           |
|                 |          | SLC35F3-R136  | tcccataatccctatcctaaa           |
| <i>TMEM132D</i> | single   | TMEM132D-F231 | ggagtgatagttgtgagtttt           |
|                 |          | TMEM132D-R231 | aaaaacctcccctaaacctaaa          |
| <i>TTC22</i>    | 1st      | TTC22-F373    | ttttgtgattgggtaagtttt           |
|                 |          | TTC22-R373    | CCCTCTACTCCCCTAACCTCA           |
|                 | 2nd      | TTC22-F245    | tttttggtatatttggtgtgtaatg       |
|                 |          | TTC22-R373    | CCCTCTACTCCCCTAACCTCA           |
| <i>TUSC3</i>    | 1st      | TUSC3-F499    | tggttttagattgaggttttaggg        |
|                 |          | TUSC3-R499    | tccattctacCTCCTTTTCTTC          |
|                 | 2nd      | TUSC3-F499    | tggttttagattgaggttttaggg        |
|                 |          | TUSC3-R347    | ACAAAACAATATCTCCTCCAC           |

**Supplementary Table 4. Methylation standards****Methylation 0%**

&gt;LA248

TCGAAAAAGAGCAGCACAGTGATG**CCCGGG**GAGGATACGTTTTCACTATGAGAGCCTGCGTGGACGTTATGTGAGCGT  
 GATGGCCGGACCGGTTTTTACAAATCAGTAAGCAGGTGAGTGCCTACGCCATGGCCGGAGTGGCTCACAGTCGGTGGT  
 CCGGCAGTACAATGGATTACCGTAAGACGGAAATCACT**CCCGGG**TATATGAAAGAGACGACCACTGCCAGGGACGAA  
 AGTGCAATGCGGCATAC

**Methylation 25%**

&gt;L306

CCCTTTGATTGGATGGTTTTGTAGGTGAGTT**CCCGGG**CGTTAATCAAAGAGGCGAACTGTGTGTGAGAGGTCCCTATGA  
 TTATGTCCGGTTATGTAAACAATCCGGAAGCGACCAACGCCTTGATTGACAAGGATGGATGGCTACATTCTGGAGAC  
 ATAGCTTACTGGGACGAAGACGAACACTTCTTCATCGTTGACCGCCTGAAGTCTCTGATTAAGTACAAAGGCTATCA  
 GGTGGCTCCCGCTGAATTGGAATCCATCTTGCTCCAACA**CCCGGG**GAGAGGTTGAGTGATGGAGGTGAAGGGCGAA

**Methylation 50%**

&gt;G414

TGTGGAATTGTGAGCGGATAACAATTTACACAGGAAACAGCTATGACCATGATTACGCCAAGCTCAGAATTAACCC  
 TACTAAAGGGACTAGTCCTGCAGTTTTAAACGAATTCGCCCTT**CCCGGG**TGGTGCCCATCCTGGTCGAGCTGGACG  
 GCGACGTAAACGGCCACAAGTTTCCGCGTGTCCGGCGAGGGCGAGGGCGATGCCACCTACGGCAAGCTGACCTGAAG  
 TTCATCTGCACCACCGCAAGCTGCCCCTGCCCTGGCCACCCTCGTGACCACCCTGACCTACGGCGTGCAGTGCTT  
 CAGCCGCTA**CCCGGG**AAGGGCGAATTCGCGGCCGCTAAATTCATTCGCCCTATAGTGAGTCGTATTACAATTCACT  
 GGCCGTCGTTTTACAACGTCGTGACTGGG

**Methylation 75%**

&gt;T353

AGGACTTTCCCGGCAACTCGCCCTCATCAAGGAGCTGGTGGACCTCCTGGGGCTGGCGCGCCTCGAGGT**CCCGGGC**  
 TACGAGGCGGACGACGTCTGGCCAGCCTGGCCAAGAAGGCGGAAAAGGAGGGCTACGAGGTCCGCATCCTCACC  
 CGACAAAGACCTTTACCAGCTCCTTTCCGACCGCATCCACGTCCTCCACCCCGAGGGGTACCTCATCACCCCGGCCT  
 GGCTTTGGGAAAAGTACGGCCTGAGGCCCGACAGTGGGCCGACTACCGGGCCCTGACCGGGGACGAGTCCGACAAC  
 CTT**CCCGGG**GTCAAGGGCATCGGGGAGAAGACGGCGAGGAAGCTT

**Methylation 100%**

&gt;T324

GCGGGACATCCACACGGAGACCGCCAGCTGGATGTTCCGGCGTCC**CCCGGG**AGGCCGTGGACCCCCTGATGCGCCGGG  
 CGGCCAAGACCATCAACTTCGGGGTCTCTACGGCATGTCCGCCACCCTCTCCAGGAGCTAGCCATCCCTTAC  
 GAGGAGGCCAGGCCTTCATTGAGCGCTACTTTCCAGAGCTTCCCAAGGTGCGGGCCTGGATTGAGAAGACCCTGGA  
 GGAGGGCAGGAGGCGGGGTACGTGGAGACCCTCTTCGGCCGCCCGCTACGTGCCAGACCTAGAGG**CCCGGG**TGA  
 AGAGCGTGCGGGAGGC
